# Supplementary material for: In situ synthesis of CdS/CdWO4 nanorods core–shell composite via acid dissolution
Source: Royal Society of Chemistry journal article supplement (doi:10.1039/c9ra09858e), 2019-12-23
Supplement: c9ra09858e1.pdf [file c9ra09858e1.pdf]

## Supplementary Information

# In Situ Synthesis of CdS/CdWO<sub>4</sub> Nanorods Core-Shell Composite via Acid Dissolution

Haruki Nagakawa<sup>a</sup> and Morio Nagata<sup>\*a</sup>

<sup>a</sup>Department of Industrial Chemistry, Graduate School of Engineering, Tokyo University of Science, 12-1 Ichigayafunagawara-cho, Shinjuku-ku, Tokyo, 162-0826, Japan.

E-mail: [nagata@ci.tus.ac.jp](mailto:nagata@ci.tus.ac.jp)

- |                                                                                                  |    |
|--------------------------------------------------------------------------------------------------|----|
| 1. XRD patterns of S-08 CW series composites                                                     | S2 |
| 2. TEM image of CdS/CdWO <sub>4</sub> composite calcined at 200°C                                | S2 |
| 3. Current potential curves over the pure CdS and S-08 CW photoanode                             | S3 |
| 4. XRD pattern of the WO <sub>3</sub> /CdS/CdWO <sub>4</sub> (Pt 1 wt%) composite photocatalyst. | S3 |
| 5. DRS spectra of the prepared WO <sub>3</sub> /CdS/CdWO <sub>4</sub> composite photocatalysts   | S4 |

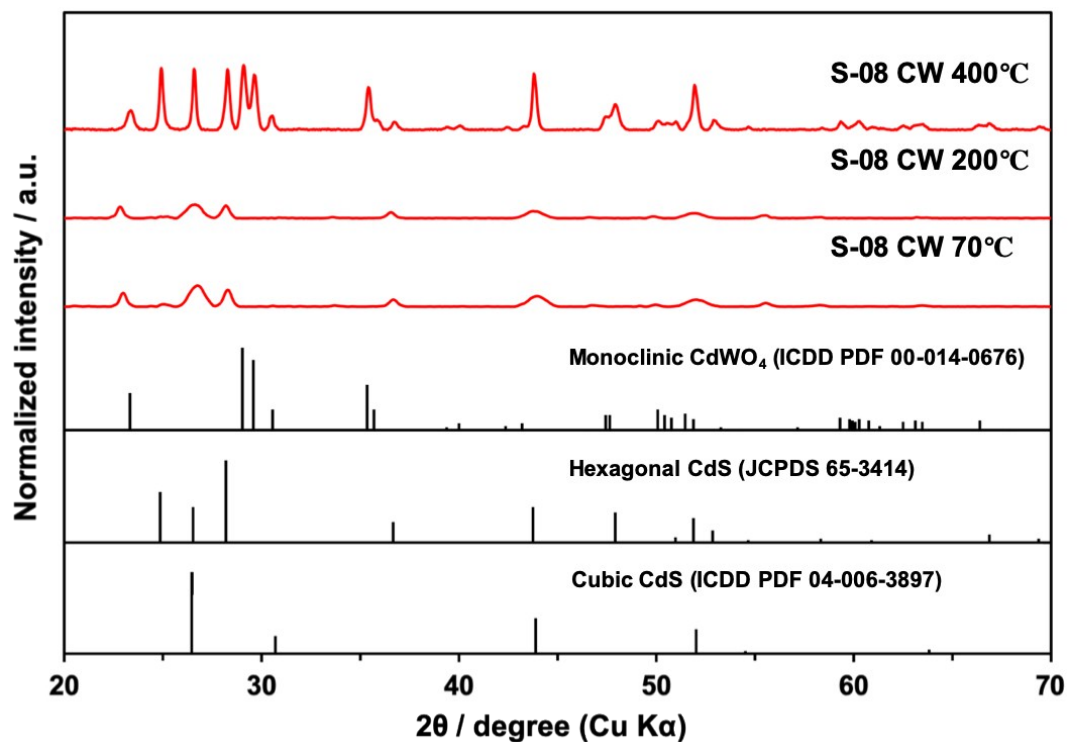

**Figure S1.** XRD patterns of the prepared CdS/CdWO<sub>4</sub> core-shell composite photocatalysts calcined at each temperature.

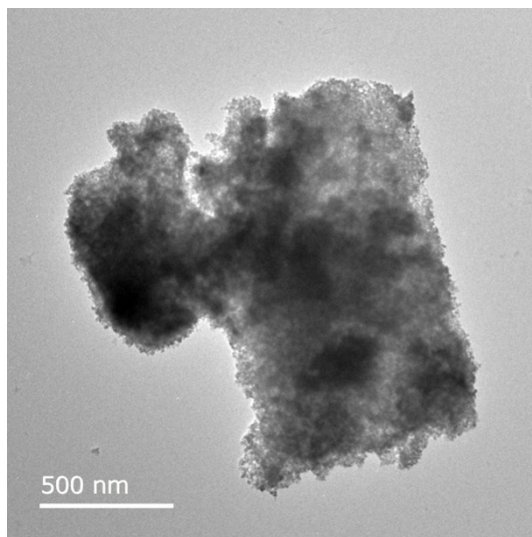

**Figure S2.** TEM image of the prepared CdS/CdWO<sub>4</sub> core-shell composite photocatalysts calcined at 200°C.



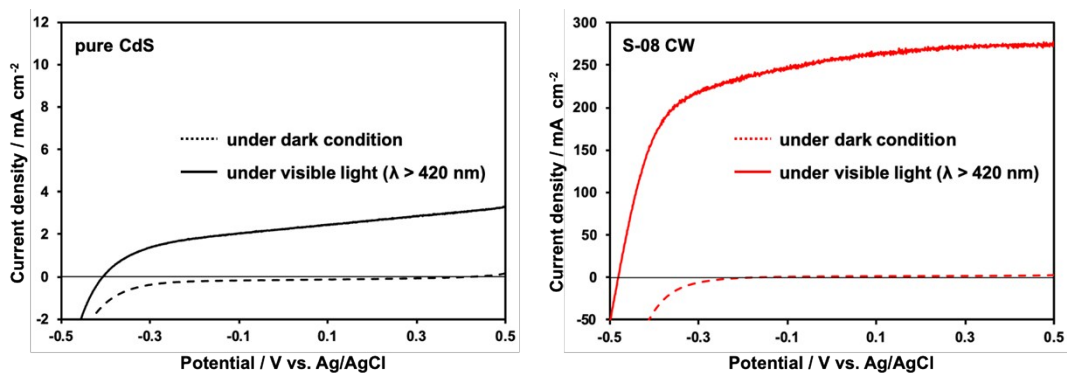

**Figure S3.** Current potential curves over the pure CdS and S-08 CW photoanode in a 0.1 M Na<sub>2</sub>SO<sub>4</sub> solution under visible light( $\lambda > 420$  nm).

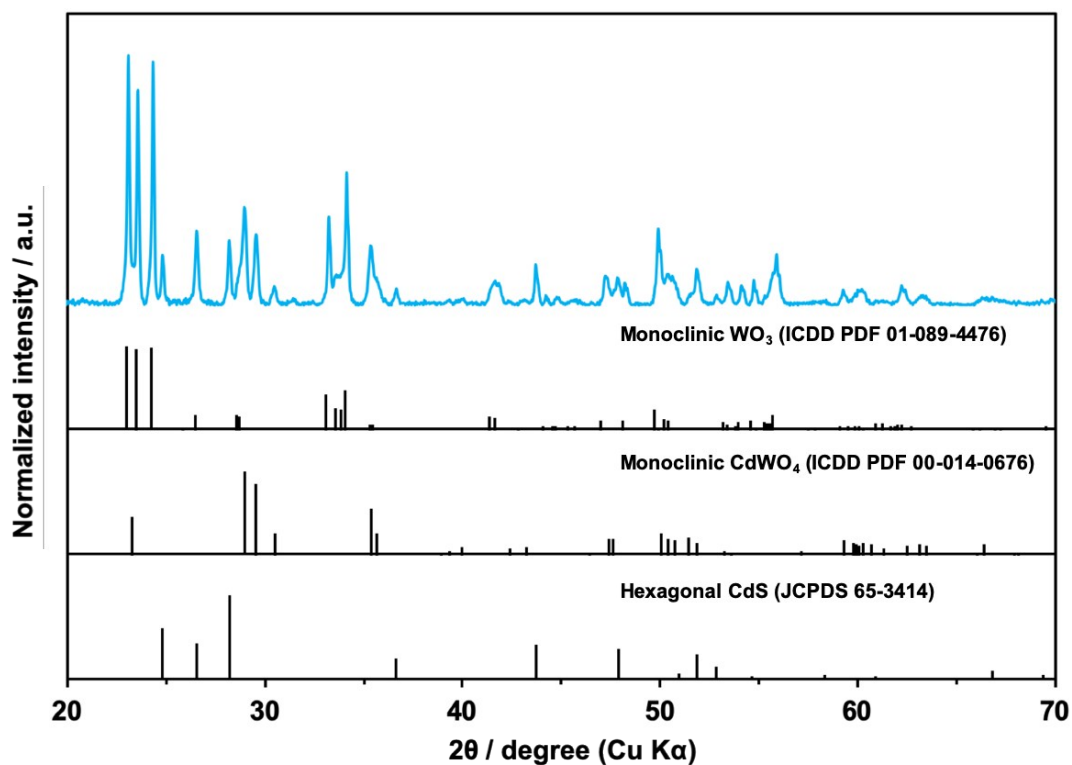

**Figure S4.** XRD pattern of the WO<sub>3</sub>/CdS/CdWO<sub>4</sub> (Pt 1 wt%) composite photocatalyst.

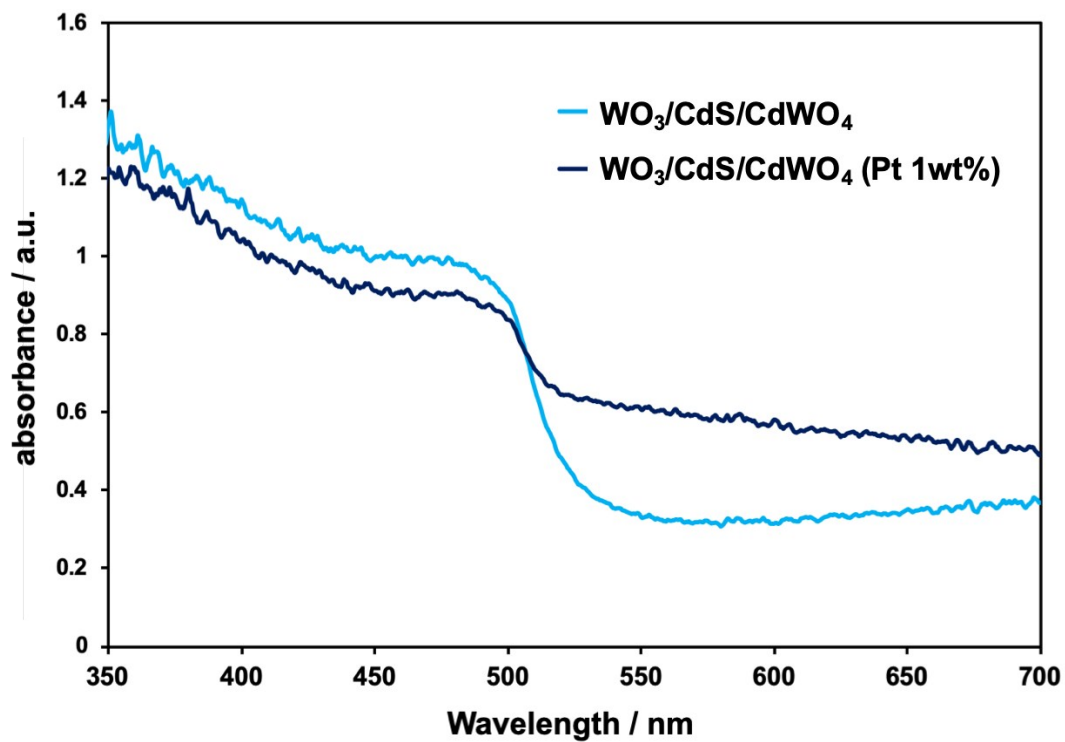

**Figure S5.** DRS spectra of the prepared WO<sub>3</sub>/CdS/CdWO<sub>4</sub> and WO<sub>3</sub>/CdS/CdWO<sub>4</sub> (Pt 1 wt%) composite photocatalysts.
